# Supplementary material
Source: ML conference proceedings conference paper supplement (https://proceedings.neurips.cc/paper_files/paper/2019/hash/d324a0cc02881779dcda44a675fdcaaa-Abstract.html)
Supplement: Supplementary file [file d324a0cc02881779dcda44a675fdcaaa-Supplemental.zip]

## A Theoretical Analysis

In this section, we provide a proof of Theorem 1, performing an analysis for the aggregation version of GMPS. However, note that our experiments find that the off-policy optimization with expert trajectories before any aggregation is also quite effective and stable empirically. First, we restate the theorem:

**Theorem 4.1** *For GMPS, assuming reward-to-go bounded by  $\delta$ , and training error bounded by  $\epsilon_{\theta*}$ , we can show that  $\mathbb{E}_{i \sim p(\mathcal{T})} [\mathbb{E}_{\pi_{\theta} + \nabla_{\theta} \mathbb{E}_{\pi_{\theta}} [R_i]} [\sum_{t=1}^H r_i(\mathbf{s}_t, \mathbf{a}_t)]] \geq \mathbb{E}_{i \sim p(\mathcal{T})} [\mathbb{E}_{\pi_i^*} [\sum_{t=1}^H r_i(\mathbf{s}_t, \mathbf{a}_t)]] - \delta \sqrt{\epsilon_{\theta*}} O(H)$ , where  $\pi_i^*$  are per-task expert policies.*

We can perform a theoretical analysis of algorithm performance in a manner similar to [18]. Given a policy  $\pi$ , let us denote  $d_{\pi}^t$  as the state distribution at time  $t$  when executing policy  $\pi$  from time 1 to  $t - 1$ . We can define the cost function for a particular task  $i$  as  $c_i(\mathbf{s}_t, \mathbf{a}_t) = -r_i(\mathbf{s}_t, \mathbf{a}_t)$  as a function of state  $\mathbf{s}_t$  and action  $\mathbf{a}_t$ , with  $c_i(\mathbf{s}_t, \mathbf{a}_t) \in [0, 1]$  without loss of generality. We will prove the bound using the notation of cost first, and subsequently express the same in terms of rewards.

Let us define  $\pi_{\theta} + \nabla_i \pi_{\theta} = \pi_{\theta + \nabla_{\theta} \mathbb{E}_{\pi_{\theta}} [R_i]}$  as a shorthand for the policy which is obtained after the inner loop update of meta-learning for task  $i$ , with return  $R_i$  during meta-optimization. This will be used throughout the proof to represent a one-step update on a task indexed by  $i$ , essentially corresponding to policy gradient in the inner loop. We define the performance of a policy  $\pi_{\theta}(\mathbf{a}_t | \mathbf{s}_t)$  over time horizon  $H$ , for a particular task  $i$  as:

$$J^i(\pi) = \sum_{t=1}^H \mathbb{E}_{\mathbf{s}_t \sim d_{\pi}^t} [\mathbb{E}_{\mathbf{a}_t \sim \pi_{\theta}(\mathbf{a}_t | \mathbf{s}_t)} [c_i(\mathbf{s}_t, \mathbf{a}_t)]].$$

This can be similarly extended to meta-updated policies as

$$J^i(\pi_{\theta} + \nabla_i \pi_{\theta}) = \sum_{t=1}^H \mathbb{E}_{\mathbf{s}_t \sim d_{\pi_{\theta} + \nabla_i \pi_{\theta}}^t} [\mathbb{E}_{\mathbf{a}_t \sim \pi_{\theta} + \nabla_i \pi_{\theta}} [c_i(\mathbf{s}_t, \mathbf{a}_t)]].$$

Let us define  $J_t^i(\pi, \tilde{\pi})$  as the expected cost for task  $i$  when executing  $\pi$  for  $t$  time steps, and then executing  $\tilde{\pi}$  for the remaining  $H - t$  time steps, and let us similarly define  $Q_t^i(\mathbf{s}, \pi, \tilde{\pi})$  as the cost of executing  $\pi$  for one time step, and then executing  $\tilde{\pi}$  for  $t - 1$  time steps.

We will assume the cost-to-go difference between the learned policy and the optimal policy for task  $i$  is bounded:  $Q_t^i(\mathbf{s}, \pi_{\theta}, \pi^*) - Q_t^i(\mathbf{s}, \pi^*, \pi^*) \leq \delta, \forall i$ . This can be ensured by assuming universality of meta-learning [10].

When collecting data in order to perform the supervised learning in the outer loop of meta optimization, we can either directly use the 1-step updated policy  $\pi_{\theta} + \nabla_i \pi_{\theta}$  for each task  $i$ , or we can use a mixture policy  $\pi_j^i = \beta_j \pi_i^* + (1 - \beta_j)(\pi_{\theta} + \nabla_i \pi_{\theta})$ , where  $j$  denotes the current iteration of meta-training. This is very similar to the mixture policy suggested in the DAgger algorithm [36]. In fact, directly using the 1-step updated policy  $\pi_{\theta} + \nabla_i \pi_{\theta}$  is equivalent to using the mixture policy with  $\beta_j = 0, \forall j$ . However, to simplify the derivation, we will assume that we always use  $\pi_{\theta} + \nabla_i \pi_{\theta}$  to collect data, but we can generalize this result to full mixture policies, which would allow us to use more expert data initially and then transition to using on-policy data.

When optimizing the supervised learning objective in the outer loop of meta-optimization to obtain the meta-learned policy initialization  $\pi_{\theta}$ , we assume the supervised learning objective function error is bounded by a constant  $D_{\text{KL}}(\pi_{\theta} + \nabla_i \pi_{\theta} || \pi_i^*) \leq \epsilon_{\theta*}$  for all tasks  $i$  and all per-task expert policies  $\pi_i^*$ . This bound essentially corresponds to assuming that the meta-learner attains bounded training error, which follows from the universality property proven in [10].

Let  $l_i(\mathbf{s}, \pi_{\theta} + \nabla_i \pi_{\theta}, \pi_i^*)$  denote the expected 0-1 loss of  $\pi_{\theta} + \nabla_i \pi_{\theta}$  with respect to  $\pi_i^*$  in state  $\mathbf{s}$ :  $\mathbb{E}_{\mathbf{a}_{\theta} \sim (\pi_{\theta} + \nabla_i \pi_{\theta})(\mathbf{a} | \mathbf{s}), \mathbf{a}^* \sim \pi_i^*(\mathbf{a} | \mathbf{s})} [\mathbb{1}[\mathbf{a}_{\theta} \neq \mathbf{a}^*]]$ . From prior work, we know that the total variation divergence is an upper bound on the 0-1 loss [27] and KL-divergence is an upper bound on the total variation divergence [33].

Therefore, the 0-1 loss can be upper bounded, for all  $\mathbf{s}$  drawn from  $\pi_\theta + \nabla_i \pi_\theta$ :

$$\begin{aligned} l_i(\mathbf{s}, \pi_\theta + \nabla_i \pi_\theta, \pi_i^*) &= D_{TV}(\pi_\theta + \nabla_i \pi_\theta \| \pi_i^*) \\ &\leq \sqrt{D_{KL}(\pi_\theta + \nabla_i \pi_\theta \| \pi_i^*)} \\ &\leq \sqrt{\epsilon_{\theta*}}. \end{aligned}$$

This allows us to bound the meta-learned policy performance using the following theorem:

**Theorem A.1** *Let the cost-to-go  $Q_t^i(\mathbf{s}, \pi_\theta + \nabla_i \pi_\theta, \pi_i^*) - Q_t^i(\mathbf{s}, \pi_i^*, \pi_i^*) \leq \delta$  for all  $t \in \{1, \dots, T\}$ ,  $i \sim p(\mathcal{T})$ . Then in GMPS,  $J(\pi_\theta + \nabla_i \pi_\theta) \leq J(\pi_i^*) + \delta \sqrt{\epsilon_{\theta*}} O(H)$ , and by extension  $\mathbb{E}_{i \sim \text{tasks}}[J(\pi_\theta + \nabla_i \pi_\theta)] \leq \mathbb{E}_{i \sim \text{tasks}}[J(\pi_i^*)] + \delta \sqrt{\epsilon_{\theta*}} O(H)$*

*Proof:*

$$\begin{aligned} J^i(\pi_\theta + \nabla_i \pi_\theta) &= J^i(\pi_i^*) + \sum_{t=0}^{T-1} J_{t+1}^i(\pi_\theta + \nabla_i \pi_\theta, \pi_i^*) - J_t^i(\pi_\theta + \nabla_i \pi_\theta, \pi_i^*) \\ &= J^i(\pi_i^*) + \sum_{t=1}^H \mathbb{E}_{\mathbf{s} \sim d_{\pi_\theta + \nabla_i \pi_\theta}^t} [Q_t^i(\mathbf{s}, \pi_\theta + \nabla_i \pi_\theta, \pi_i^*) - Q_t^i(\mathbf{s}, \pi_i^*, \pi_i^*)] \\ &\leq J^i(\pi_i^*) + \delta \sum_{t=1}^H \mathbb{E}_{\mathbf{s} \sim d_{\pi_\theta + \nabla_i \pi_\theta}^t} [l_i(\mathbf{s}, \pi_\theta + \nabla_i \pi_\theta, \pi_i^*)] \end{aligned} \quad (4a)$$

$$\begin{aligned} &\leq J^i(\pi_i^*) + \delta \sum_{t=1}^H \sqrt{\epsilon_{\theta*}} \\ &= J^i(\pi_i^*) + \delta T \sqrt{\epsilon_{\theta*}} \end{aligned} \quad (4b)$$

Equation 4a follows from the fact that the expected 0-1 loss of  $\pi_\theta + \nabla_i \pi_\theta$  with respect to  $\pi_i^*$  is the probability that  $\pi_\theta + \nabla_i \pi_\theta$  and  $\pi_i^*$  pick different actions in  $\mathbf{s}$ ; when they choose different actions, the cost-to-go increases by  $\delta$ . Equation 4b follows from the upper bound on the 0-1 loss.

Now that we have the proof for a particular  $i$ , we can simply take expectation with respect to  $i$  sampled from the distribution of tasks to get the full result.

*Proof:*

$$\begin{aligned} J^i(\pi_\theta + \nabla_i \pi_\theta) &\leq J^i(\pi_i^*) + \delta T \sqrt{\epsilon_{\theta*}} \\ \implies \mathbb{E}_{i \sim p(\text{tasks})}[J^i(\pi_\theta + \nabla_i \pi_\theta)] &\leq \mathbb{E}_{i \sim p(\text{tasks})}[J^i(\pi_i^*)] + \delta T \sqrt{\epsilon_{\theta*}} \end{aligned} \quad (5a)$$

Now in order to convert back to the version using rewards instead of costs, we can simply negate the bound, thereby giving us the original theorem 4.1, which states:

$$\mathbb{E}_{i \sim p(\mathcal{T})}[\mathbb{E}_{\pi_\theta + \nabla_i \pi_\theta}[\sum_{t=1}^T r_i(\mathbf{s}_t, \mathbf{a}_t)]] \geq \mathbb{E}_{i \sim p(\mathcal{T})}[\mathbb{E}_{\pi_i^*}[\sum_{t=1}^H r_i(\mathbf{s}_t, \mathbf{a}_t)]] - \delta \sqrt{\epsilon_{\theta*}} O(H)$$

.

## B Reward Functions

Below are the reward functions used for each of our experiments.

- Sawyer Pushing (for both full state and vision observations)

$$R = -\|x_{obj} - x_{pusher}\|_2 + 100 \mid c - \|x_{goal} - x_{pusher}\|_2 \mid$$

where  $c$  is the initial distance between the object and the goal (a constant).

- Door Opening

$$R = \begin{cases} 10x & x \leq x^* \\ 10(x^* - (x - x^*)) & x > x^* \end{cases}$$

where  $x$  is the current door angle, and  $x^*$  is the target door angle

- Legged Locomotion (dense reward)

$$R = -\|x - x^*\|_1 + 4.0$$

where  $x$  is the location of centre of mass of the ant,  $x^*$  is the goal location.

- Legged Locomotion (sparse reward)

$$R = \begin{cases} -\|x - x^*\|_1 + 4.0 & \|x - x^*\|_2 \leq 0.8 \\ -m + 4.0 & \|x - x^*\|_2 > 0.8 \end{cases}$$

where  $x$  is the location of center of mass of the ant,  $x^*$  is the goal location, and  $m$  is the initial  $\ell_1$  distance between  $x$  and  $x^*$  (a constant).

## C Architectures

- State-based Experiments

Used a neural network with two hidden layers of 100 units with ReLU nonlinearities each for GMPS, MAML, multi-task learning, and MAESN. As shown in prior work [11], adding a bias transformation variable helps improve performance for MAML, so we ran experiments including this variation. [The bias transformation variable is simply a variable appended to the observation, before being passed into the policy. This variable is also adapted with gradient descent in the inner loop]. The learning rate for the fast adaptation step ( $\alpha$ ) is also meta-learned.

- Vision-based Experiments

The image is passed through a convolutional neural network, followed by a spatial soft-argmax [23], followed by a fully connected network block. The 3D end-effector position is appended to the result of the spatial soft-argmax, which is then passed through a fully connected neural network block. The convolution block is specified as follows: 16 filters of size 5 with stride 3, followed by 16 filters of size 3 with stride 3, followed by 16 filters of size 3 with stride 1. The fully-connected block is as follows: 2 hidden layers of 100 units each. All hidden layers use ReLU nonlinearities.

## D HyperParameters

The following are the hyper-parameter sweeps for each of the methods [run for each of the experimental domains], run over 3 seeds.

### 1. GMPS

- (a) Number of trajectories sampled per task. : [20, 50]
- (b) Number of tasks for meta-learning: [10, 20]
- (c) Initial value for fast adaptation learning rate: [0.5, 0.1]
- (d) Variables included for fast adaptation: [all parameters, only bias transform variable]
- (e) Dimension of bias transform variable: [2, 4]
- (f) Number of imitation steps in between sampling new data from the pre-update policy: [1, 200, 500, 1000, 2000]

### 2. MAML

Hyper-parameter sweeps (a) - (d) from GMPS

### 3. MAESN

Hyper-parameter sweeps (a) - (c) from GMPS

- 588           (a) Dimension of latent variable: [2,4]
- 589   4. MultiTask
- 590           (a) Batch size: [10000, 50000]
- 591           (b) Learning rate: [0.01, 0.02]
- 592   5. Contextual SAC [which is used to learn experts that are then used for GMPS]
- 593           (a) Reward scale: [10, 50, 100] (constant which scales the reward)
- 594           (b) Number of gradient steps taken for each batch of collected data: [1, 5, 10]
